# Supplementary material for: Year-long evaluation of aerosol chemistry and meteorological implications of PM2.5 in an urban area of the Brahmaputra Valley, India
Source: Royal Society of Chemistry journal article supplement (doi:10.1039/d2ea00120a), 2022-11-17
Supplement: d2ea00120a1.pdf [file d2ea00120a1.pdf]

**Supplementary Information**

**Year-long aerosol chemistry and meteorological implications of PM<sub>2.5</sub> in  
urban area of the Brahmaputra Valley, India**

Shahadev Rabha<sup>1,2</sup> Nazrul Islam<sup>1,2</sup> Binoy K Saikia<sup>1,2\*</sup> Gyanesh Kumar Singh<sup>3</sup> Adnan Mateen  
Qadri<sup>3</sup> Vivek Srivastava<sup>3</sup> and Tarun Gupta<sup>3</sup>

<sup>1</sup>Coal and Energy Division, CSIR-North East Institute of Science and Technology, Jorhat-  
785006, Assam, India

<sup>2</sup>Academy of Scientific and Innovative Research (AcSIR), Ghaziabad, 201002, India

<sup>3</sup>Department of Civil Engineering, Indian Institute of Technology, Kanpur-208016 (UP),  
India.

\*Corresponding author: [bksaikia@neist.res.in](mailto:bksaikia@neist.res.in); [bksaikia@gmail.com](mailto:bksaikia@gmail.com)

13

14 **Supplementary Figures**

15

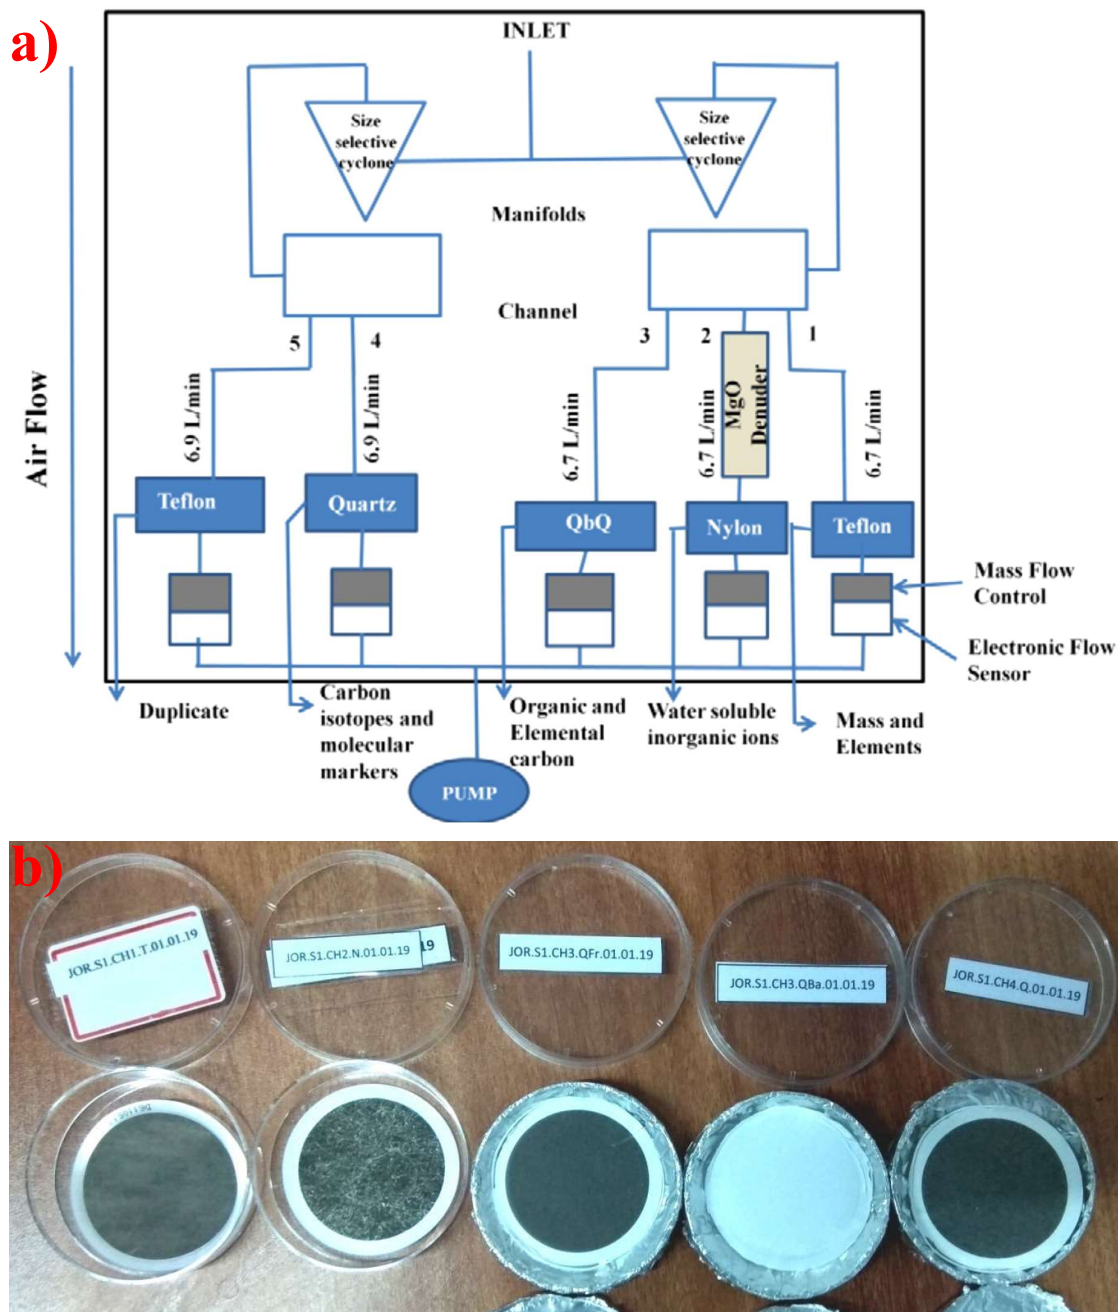

16 Fig. S1. a) Flowchart of the SASS sampling system and b) filter substrates after sampling (only  
 17 first three filters were used in the present study)

18

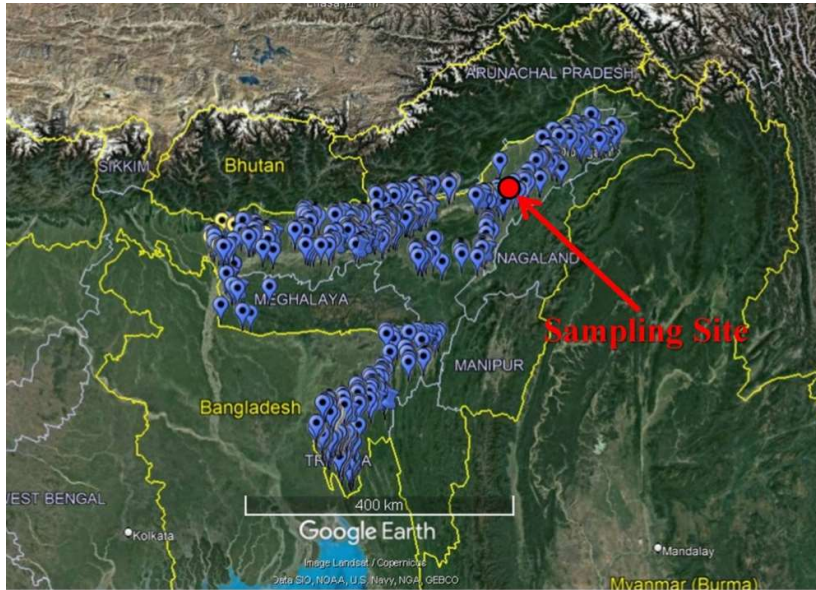

Fig. S2. Location of Brick Kilns in the NE India as per the data retrieved from Google Earth (imagery date from December 2018 to April 2019, date of access was 25<sup>th</sup> to 30<sup>th</sup> August 2020).

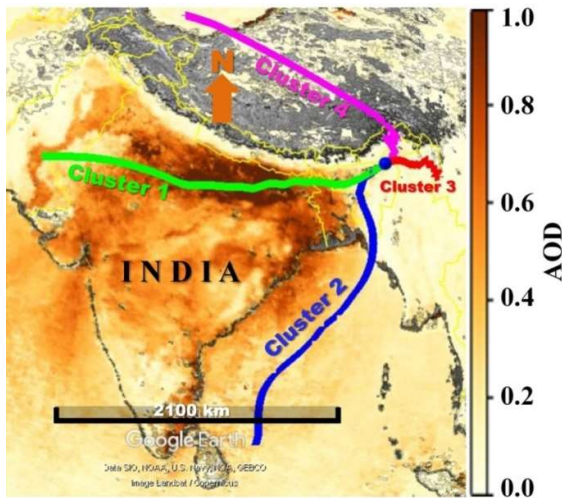

Fig. S3. Mean five-day back-trajectory for the four main clusters at Jorhat and the map shows the annual mean AOD in 2019. It shows that cluster 1 back-trajectory moves over the high AOD region which can carry more pollutants.

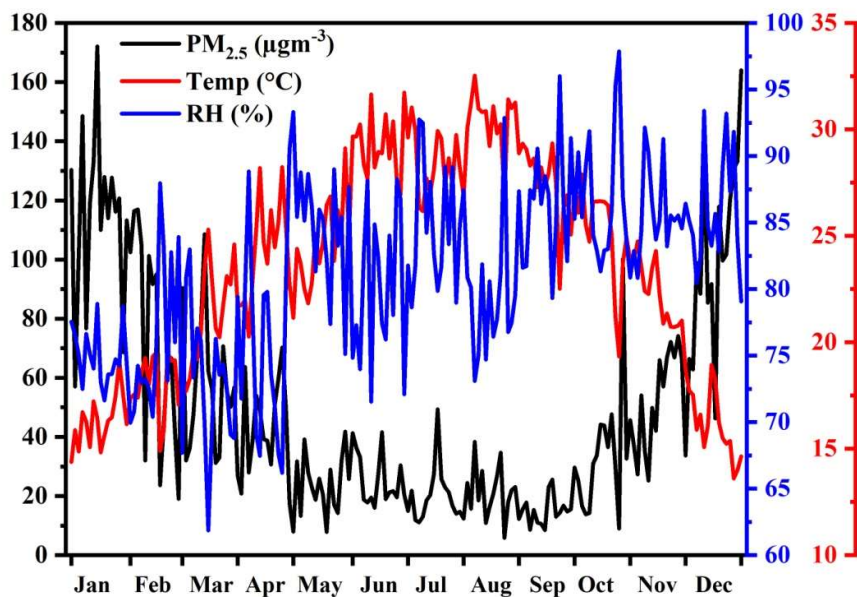

28  
29 Fig. S4. Graph between daily averages of PM<sub>2.5</sub> concentration ( $\mu\text{g m}^{-3}$ ), temperature ( $^{\circ}\text{C}$ ), and  
30 relative humidity (%) for the year 2019.

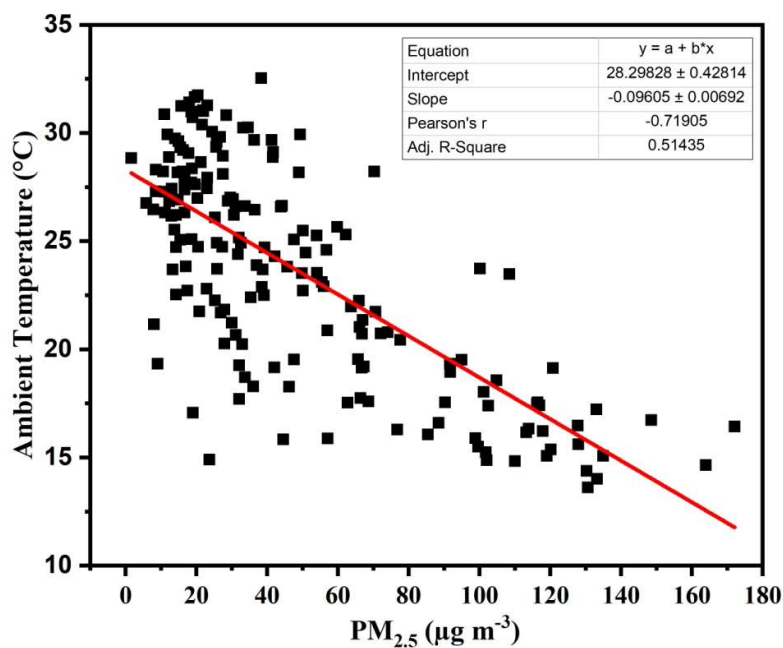

32  
33 Fig. S5. Scatter plot between PM<sub>2.5</sub> and ambient temperature showing a strong negative  
34 correlation.

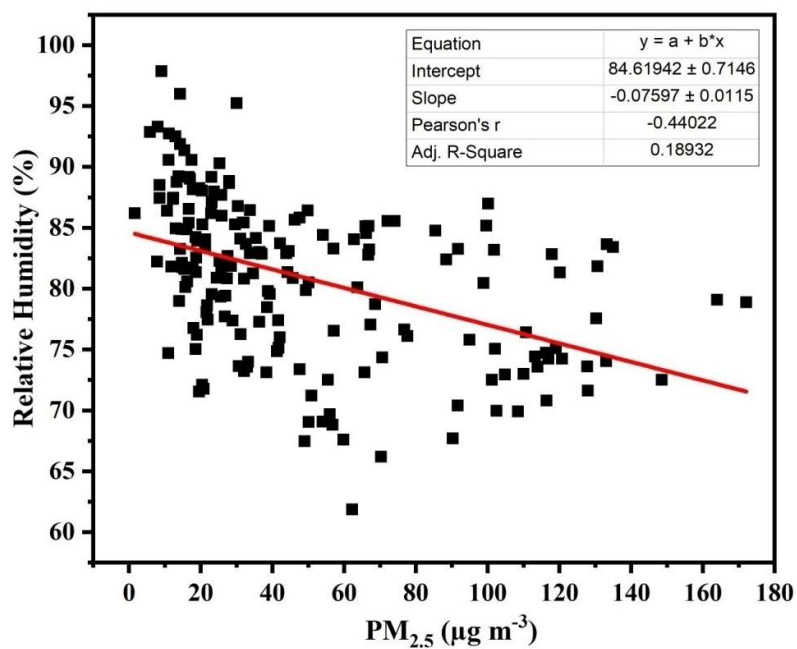

35

36 Fig. S6. Scatter plot between  $PM_{2.5}$  and relative humidity showing a weak negative  
37 correlation.

38

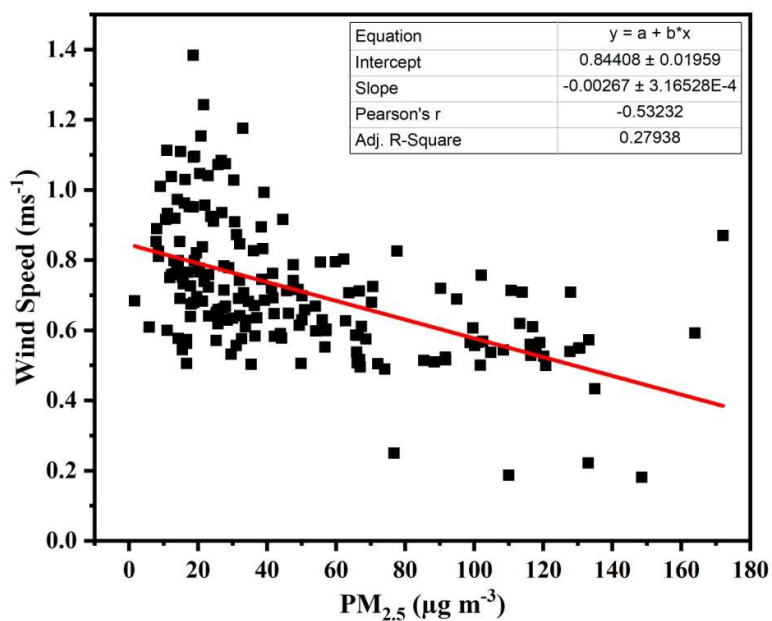

39

40 Fig. S7. Scatter plot between  $PM_{2.5}$  and wind speed showing a weak negative correlation.

41

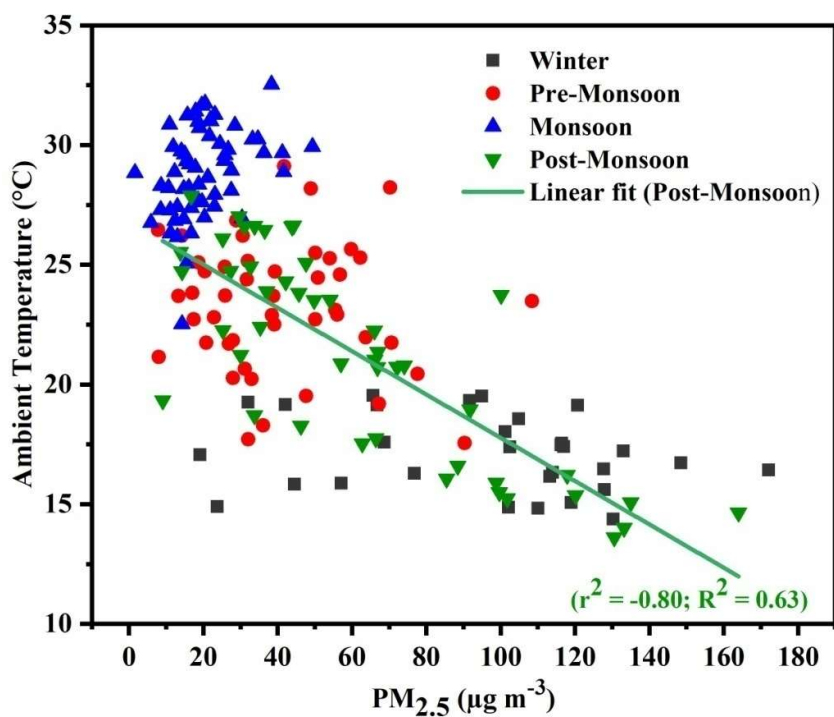

Fig. S8. Seasonal relationship between ambient temperature and PM<sub>2.5</sub>.

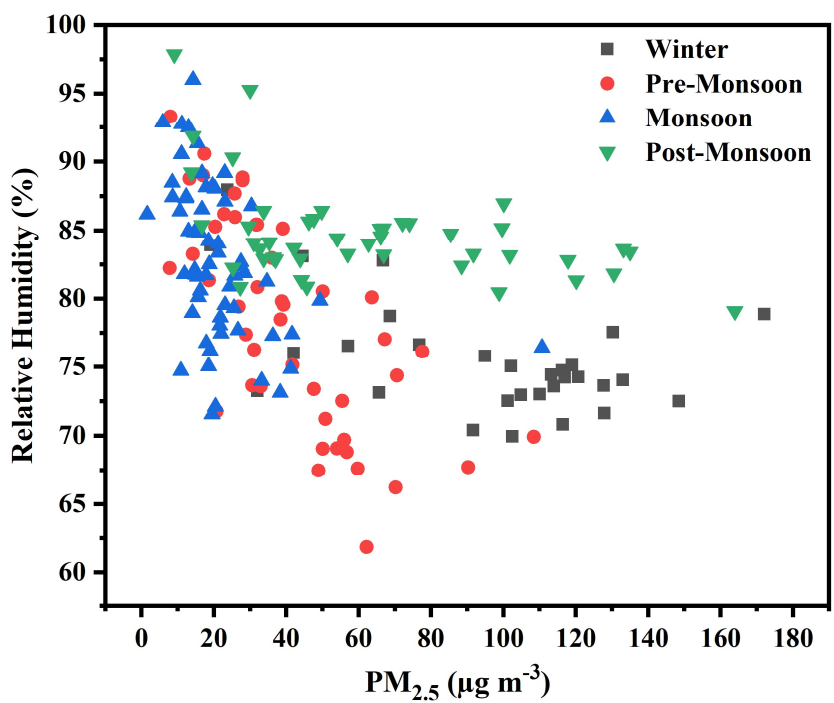

Fig. S9. Seasonal relationship between relative humidity and PM<sub>2.5</sub>.



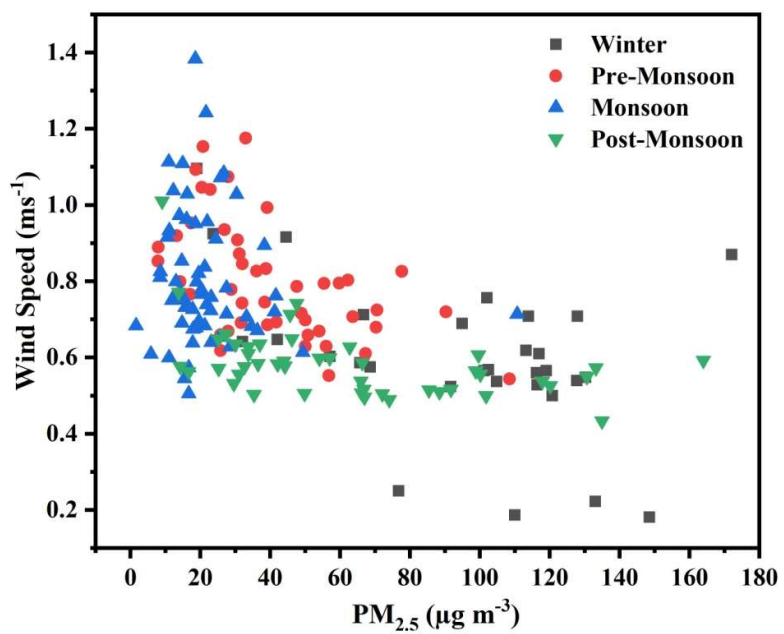

48

49 Fig. S10. Seasonal relationship between wind speed and  $\text{PM}_{2.5}$ .

## 50 Supplementary Tables

51 Table S1: Annual, seasonal, and monthly concentration of PM<sub>2.5</sub> in 2019.

| PM <sub>2.5</sub> (μg m <sup>-3</sup> ) | Average ± SD | Maximum | Minimum |
|-----------------------------------------|--------------|---------|---------|
| Annual (n= 183)                         | 48.9 ± 37.8  | 172.1   | 5.9     |
| Winter (n= 30)                          | 95.3 ± 37.9  | 172.1   | 19.1    |
| Pre-Monsoon (n= 46)                     | 41.1 ± 21.8  | 108.5   | 7.9     |
| Monsoon (n= 61)                         | 21.8 ± 14.5  | 110.7   | 5.9     |
| Post-Monsoon (n= 46)                    | 62.4 ± 37.5  | 164.0   | 9.1     |

52 \*SD = Standard Deviation, n = number of sample

53 Table S2: Seasonal and annual percentage concentration of cations and anions of total PM<sub>2.5</sub>

| Ions                          | % Concentration |             |         |              |        |
|-------------------------------|-----------------|-------------|---------|--------------|--------|
|                               | Winter          | Pre-Monsoon | Monsoon | Post-Monsoon | Annual |
| Cl <sup>-</sup>               | 20.4            | 8.7         | 23.5    | 33.3         | 20.5   |
| NO <sub>3</sub> <sup>-</sup>  | 14.7            | 7.5         | 2.4     | 10.1         | 9.7    |
| SO <sub>4</sub> <sup>2-</sup> | 30.5            | 43.3        | 5.4     | 23.3         | 27.3   |
| Na <sup>+</sup>               | 2.4             | 2.0         | 0.5     | 1.4          | 1.8    |
| NH <sub>4</sub> <sup>+</sup>  | 20.4            | 26.4        | 60.0    | 18.9         | 29.4   |
| Mg <sup>2+</sup>              | 0.9             | 2.7         | 1.9     | 1.0          | 1.6    |
| K <sup>+</sup>                | 7.7             | 6.4         | 4.2     | 9.5          | 7.0    |
| Ca <sup>2+</sup>              | 3.2             | 3.1         | 2.1     | 2.4          | 2.8    |
| Total Anions                  | 65.5            | 59.5        | 31.3    | 66.7         | 57.5   |
| Total Cations                 | 34.5            | 40.5        | 68.7    | 33.3         | 42.5   |

54

55 Table S3: Comparative ionic ratios of aerosols and seawater for determining the marine  
56 influence to the PM<sub>2.5</sub> mass.

|              | Marine Influence                  |                                  |                                    |                                    |                                                 |
|--------------|-----------------------------------|----------------------------------|------------------------------------|------------------------------------|-------------------------------------------------|
|              | Cl <sup>-</sup> / Na <sup>+</sup> | K <sup>+</sup> / Na <sup>+</sup> | Mg <sup>2+</sup> / Na <sup>+</sup> | Ca <sup>2+</sup> / Na <sup>+</sup> | SO <sub>4</sub> <sup>2-</sup> / Na <sup>+</sup> |
| Winter       | 8.6                               | 3.2                              | 0.4                                | 1.3                                | 12.8                                            |
| Pre-Monsoon  | 4.3                               | 3.2                              | 1.3                                | 1.5                                | 21.4                                            |
| Monsoon      | 50.4                              | 9.0                              | 4.1                                | 4.6                                | 11.5                                            |
| Post-Monsoon | 23.4                              | 6.7                              | 0.7                                | 1.7                                | 16.4                                            |
| Annual       | 13.2                              | 4.3                              | 1.1                                | 1.7                                | 16.2                                            |
| Seawater     | 1.80                              | 0.04                             | 0.01                               | 0.04                               | 0.25                                            |



57 Table S4: Concentration of water-soluble inorganic ions (WSIIs) in 2019

| Ions ( $\mu\text{g m}^{-3}$ ) | Winter $\pm$ SD | Pre-Monsoon $\pm$ SD | Monsoon $\pm$ SD | Post-Monsoon $\pm$ SD | Annual Mean $\pm$ SD |
|-------------------------------|-----------------|----------------------|------------------|-----------------------|----------------------|
| $\text{Cl}^-$                 | $4.6 \pm 0.8$   | $1.2 \pm 1.3$        | $2.7 \pm 0.3$    | $3.5 \pm 0.9$         | $3.0 \pm 1.5$        |
| $\text{NO}_3^-$               | $3.4 \pm 1.6$   | $1.1 \pm 1.5$        | $0.3 \pm 0.3$    | $1.1 \pm 0.8$         | $1.4 \pm 1.5$        |
| $\text{SO}_4^{2-}$            | $6.9 \pm 5.5$   | $6.1 \pm 3.9$        | $0.6 \pm 1.1$    | $2.4 \pm 2.4$         | $4.0 \pm 4.1$        |
| $\text{Na}^+$                 | $0.5 \pm 0.4$   | $0.3 \pm 0.2$        | $0.1 \pm 0.1$    | $0.2 \pm 0.2$         | $0.3 \pm 0.3$        |
| $\text{NH}_4^+$               | $4.6 \pm 1.4$   | $3.7 \pm 1.8$        | $7.0 \pm 9.8$    | $2.0 \pm 1.3$         | $4.3 \pm 6.1$        |
| $\text{Mg}^{2+}$              | $0.2 \pm 0.1$   | $0.4 \pm 0.4$        | $0.2 \pm 0.5$    | $0.1 \pm 0.1$         | $0.2 \pm 0.4$        |
| $\text{K}^+$                  | $1.8 \pm 0.6$   | $0.9 \pm 0.4$        | $0.5 \pm 0.2$    | $1.0 \pm 1.3$         | $1.0 \pm 0.8$        |
| $\text{Ca}^{2+}$              | $0.7 \pm 0.5$   | $0.4 \pm 0.2$        | $0.3 \pm 0.1$    | $0.3 \pm 0.1$         | $0.4 \pm 0.3$        |
| Total Anions                  | $14.9 \pm 6.9$  | $8.3 \pm 4.4$        | $3.6 \pm 1.4$    | $6.9 \pm 3.7$         | $8.5 \pm 5.6$        |
| Total Cations                 | $7.9 \pm 1.7$   | $5.7 \pm 2.2$        | $8.0 \pm 9.8$    | $3.5 \pm 2.0$         | $6.2 \pm 6.1$        |
| Total WSIIs                   | $22.8 \pm 8.1$  | $14.0 \pm 5.6$       | $11.6 \pm 9.5$   | $10.4 \pm 5.6$        | $15.0 \pm 8.6$       |

58

59 Table S5: Average annual concentration and seasonal variation of major inorganic/metal

60 elements ( $\text{ng m}^{-3}$ ).

| Species | Winter $\pm$ SD    | Pre-Monsoon $\pm$ SD | Monsoon $\pm$ SD  | Post-Monsoon $\pm$ SD | Annual $\pm$ SD    |
|---------|--------------------|----------------------|-------------------|-----------------------|--------------------|
| Na      | $73.7 \pm 86.1$    | $212.8 \pm 124.8$    | $130.5 \pm 105.8$ | $134.0 \pm 153.4$     | $142.9 \pm 130.0$  |
| Al      | $26.4 \pm 53.4$    | $413.2 \pm 413.6$    | $14.8 \pm 58.6$   | $280.1 \pm 1836.5$    | $183.4 \pm 950.9$  |
| Si      | $602.5 \pm 219.7$  | $1671.8 \pm 1106.9$  | $262.1 \pm 249.5$ | $256.1 \pm 94.1$      | $677.6 \pm 838.1$  |
| S       | $2252.2 \pm 858.3$ | $1873.5 \pm 921.6$   | $889.9 \pm 675.7$ | $1153.3 \pm 729.7$    | $1432.7 \pm 951.9$ |
| Cl      | $1215.5 \pm 983.9$ | $141.4 \pm 149.6$    | $65.5 \pm 33.0$   | $751.6 \pm 983.6$     | $444.3 \pm 775.1$  |
| K       | $1837.1 \pm 797.3$ | $900.0 \pm 474.9$    | $234.6 \pm 156.3$ | $1130.4 \pm 1967.8$   | $890.7 \pm 1197.1$ |
| Ca      | $29.0 \pm 27.4$    | $108.4 \pm 101.2$    | $23.7 \pm 63.2$   | $12.4 \pm 31.5$       | $43.5 \pm 76.3$    |
| Fe      | $150.6 \pm 94.2$   | $479.5 \pm 363.4$    | $49.8 \pm 93.1$   | $44.2 \pm 63.0$       | $181.0 \pm 204.9$  |

61

62 Table S6: Average annual concentration and seasonal variation of trace inorganic/metal

63 elements ( $\text{ng m}^{-3}$ ).

| Species | Winter $\pm$ SD | Pre-Monsoon $\pm$ SD | Monsoon $\pm$ SD | Post-Monsoon $\pm$ SD | Annual Mean $\pm$ SD |
|---------|-----------------|----------------------|------------------|-----------------------|----------------------|
| Ti      | $1.1 \pm 3.1$   | $27.5 \pm 28.8$      | $2.7 \pm 7.5$    | <MDL                  | $7.8 \pm 13.2$       |
| V       | $83.4 \pm 10.2$ | $76.8 \pm 18.7$      | $100.3 \pm 16.5$ | $71.5 \pm 23.0$       | $83.0 \pm 12.5$      |
| Mn      | $2.4 \pm 3.4$   | $5.9 \pm 6.8$        | $0.1 \pm 0.5$    | $3.3 \pm 8.2$         | $2.9 \pm 2.4$        |
| Co      | $9.8 \pm 3.7$   | $9.4 \pm 6.2$        | $15.0 \pm 5.7$   | $7.4 \pm 6.5$         | $10.4 \pm 3.3$       |
| Ni      | $14.4 \pm 1.8$  | $12.9 \pm 1.6$       | $14.1 \pm 3.6$   | $14.6 \pm 0.8$        | $14.0 \pm 0.8$       |
| Zn      | $57.2 \pm 40.5$ | $44.2 \pm 58.2$      | $9.1 \pm 19.4$   | $41.5 \pm 50.3$       | $38.0 \pm 20.5$      |
| Br      | $3.1 \pm 2.4$   | $0.7 \pm 1.0$        | <MDL             | $1.2 \pm 2.0$         | $1.2 \pm 1.3$        |
| Rb      | $2.5 \pm 3.5$   | $0.1 \pm 0.4$        | <MDL             | $1.1 \pm 3.9$         | $0.9 \pm 1.2$        |

|    |             |             |             |             |             |
|----|-------------|-------------|-------------|-------------|-------------|
| Sr | 17.5 ± 4.5  | 14.2 ± 3.5  | 10.6 ± 2.0  | 12.6 ± 4.7  | 13.7 ± 2.9  |
| Zr | 2.4 ± 1.0   | 2.6 ± 1.9   | 2.8 ± 1.6   | 1.1 ± 1.2   | 2.2 ± 0.8   |
| Mo | 6.8 ± 9.9   | 9.2 ± 13.8  | 30.0 ± 20.3 | 13.8 ± 16.8 | 15.0 ± 10.4 |
| Sb | 8.9 ± 9.9   | 11.9 ± 16.2 | 23.6 ± 17.8 | 8.1 ± 14.29 | 13.1 ± 7.2  |
| I  | 2.4 ± 2.8   | 0.2 ± 0.4   | <MDL        | 0.8 ± 2.0   | 0.8 ± 1.1   |
| Cs | 15.4 ± 8.4  | 3.8 ± 6.4   | <MDL        | 5.0 ± 7.6   | 6.1 ± 6.6   |
| Ba | 53.0 ± 10.3 | 42.8 ± 21.6 | 51.1 ± 17.6 | 43.2 ± 37.2 | 47.5 ± 5.3  |
| Pb | 11.8 ± 8.1  | 7.8 ± 9.0   | 1.3 ± 4.5   | 7.5 ± 7.1   | 7.1 ± 4.3   |

64

65 Table S7: Average annual concentration and seasonal variation of carbonaceous matters ( $\mu\text{g}$   
66  $\text{m}^{-3}$ ).

| Species | Winter<br>± SD | Pre-Monsoon<br>± SD | Monsoon ±<br>SD | Post-Monsoon<br>± SD | Annual ±<br>SD |
|---------|----------------|---------------------|-----------------|----------------------|----------------|
| OC      | 14.8 ± 7.3     | 4.9 ± 3.1           | 2.2 ± 1.4       | 10.5 ± 7.5           | 6.1 ± 5.4      |
| EC      | 12.1 ± 6.7     | 2.8 ± 1.2           | 1.0 ± 1.2       | 8.7 ± 7.0            | 4.3 ± 3.8      |
| SOC     | 7.9 ± 4.5      | 3.3 ± 2.1           | 1.6 ± 1.3       | 5.5 ± 4.0            | 3.7 ± 1.6      |
| OC+EC   | 26.9 ± 14.0    | 7.7 ± 4.3           | 3.2 ± 2.6       | 19.2 ± 14.5          | 10.4 ± 9.3     |
| Char-EC | 3.0 ± 2.5      | 0.0 ± 1.5           | 0.1 ± 0.7       | 2.2 ± 3.1            | 1.1 ± 2.4      |
| Soot-EC | 9.1 ± 4.6      | 2.8 ± 2.1           | 0.9 ± 0.9       | 6.5 ± 4.4            | 4.3 ± 4.4      |

67

68 Table S8: Percentage (%) of air mass back-trajectory arriving at Jorhat from different clusters  
69 during the sampling period.

| Season              | Cluster 1 | Cluster 2 | Cluster 3 | Cluster 4 |
|---------------------|-----------|-----------|-----------|-----------|
| Winter(n= 30)       | 70        | -         | 23        | 7         |
| Pre-Monsoon(n= 46)  | 67        | 21        | 12        | -         |
| Monsoon(n= 61)      | 10        | 68        | 22        | -         |
| Post-Monsoon(n= 61) | 38        | 22        | 40        | -         |

70
